# Supplementary material for: Defining the functional determinants for RNA surveillance by RIG-I
Source: PubMed Central journal article supplement — EMBO Rep. 2013 Jul 30;14(9):772–9. doi: 10.1038/embor.2013.108 (PMC3790051; doi:10.1038/embor.2013.108), 2013-07-30
Supplement: embor2013108s1.pdf [file embor2013108s1.pdf]

1 **Supplementary Information**

2  
3  
4 **Defining the functional determinants for RNA surveillance by RIG-I**

5  
6 Andrew Kohlway<sup>1\*</sup>, Dahai Luo<sup>2,4\*</sup>, David C. Rawling<sup>1</sup>, Steve C. Ding<sup>1</sup>, Anna Marie Pyle<sup>2,3,4#</sup>

7 <sup>1</sup>Department of Molecular Biophysics and Biochemistry, <sup>2</sup>Department of Molecular, Cellular,  
8 and Developmental Biology, <sup>3</sup>Department of Chemistry, Yale University, New Haven,  
9 Connecticut 06520, <sup>4</sup>Howard Hughes Medical Institute, Chevy Chase, Maryland 20815.

10  
11  
12  
13 <sup>#</sup> To whom correspondence may be addressed.

14 E-mail: [anna.pyle@yale.edu](mailto:anna.pyle@yale.edu)

15  
16 \*These authors contributed equally to this work.

17

18

19 **Inventory of Supplemental Information**

20

21 **Supplementary Methods**

22

23 **Supplementary Table 1. Crystallographic and structure refinement statistics.**

24 **Supplementary Table 2. Nucleic acids used in this study.**

25 **Supplementary Table 3. Poly I:C ng/ $\mu$ l to nanomolar calculations.**

26 **Supplementary Table 4. RNA stimulated ATP hydrolysis by RIG-I.**

27

28 **Supplementary Figure 1.  $K_{m,ATP}$  and  $K_{m,RNA}$  ATPase experiments on LMW poly I:C.**

29 **Supplementary Figure 2.  $K_{m,ATP}$  and  $K_{m,RNA}$  ATPase experiments on short duplex RNA.**

30 **Supplementary Figure 3. Mock control for HEK293T cell culture IFN production.**

31 **Supplementary Figure 4. Cell culture IFN production on different lengths of poly I:C.**

32

33 **Supplementary Movie 1. Scanning motions of RIG-I on duplex RNA. (morph5b.mpg /**

34 **morph5c.mpg).** The morph is generated from the three structures presented in this study.

35

36 **Supplementary References**

37

38

39

40

41

42

## 43 **Supplementary Methods**

### 44 **Cloning, Expression, and Purification**

45 Briefly, the constructs were cloned into the pET-SUMO vector (Invitrogen) and  
46 transformed into Rosetta II(DE3) *E.coli* cells (Novagen). The proteins were expressed in LB  
47 media upon the addition of 0.5 mM isopropyl- $\beta$ -D-thiogalactopyranoside (IPTG) and grown at  
48 18 °C overnight for 20 hours. The cells were then lysed with a microfluidizer at 15,000 psi,  
49 clarified by centrifugation, and purified by batch binding with Ni-NTA beads (Qiagen). After  
50 collection and elution from Biorad polyprep columns, the RIG-I constructs were concentrated on  
51 a HiTrap Heparin HP column (GE Healthcare) and gel filtered over a HiPrep 16/60 Superdex  
52 200 column (GE Healthcare) in buffer containing 25 mM Hepes, pH 7.4, 150 mM NaCl, 5 %  
53 glycerol, 5 mM  $\beta$ -ME. RIG-I preparations were concentrated to between 5-10 mg/mL with a  
54 50k MW cutoff Amicon centrifugal concentrator (Millipore), and concentrations were  
55 determined spectrophotometrically, using the extinction coefficients of  $\epsilon = 99,700 \text{ M}^{-1} \text{ cm}^{-1}$  for  
56 full length RIG-I and an  $\epsilon = 60,280 \text{ M}^{-1} \text{ cm}^{-1}$  for the RIG-I ( $\Delta$ CARDs:1-229) N-terminal deletion  
57 construct. The extinction coefficients were calculated theoretically from the RIG-I sequence and  
58 guanidinium chloride denaturation of protein preparations. The RIG-I preparations were flash  
59 frozen with liquid nitrogen and stored at -80 °C.

### 60 **RNA synthesis and transcription**

61 The 2'-O-methyl modification on the penultimate nucleotide of the template strand  
62 prevents T7 terminal transferase activity as previously described (Kao et al, 1999). Incorporation  
63 of 2'-OMe modifications within the DNA template prevents addition of +1 and +2 nucleotides  
64 by T7 RNA polymerase and results in transcription of RNA molecules with defined, uniform 3'-  
65 ends, which is obviously essential for studies of RIG-I binding and stimulation. All synthesized  
66 and transcribed RNA constructs were purified on 20% denaturing polyacrylamide gels. LMW

67 polyI:C (Invivogen) was dissolved in buffer containing Hepes (pH 7.4), 150 mM NaCl, 5%  
68 glycerol, 5 mM BME to a final concentration of 10 mg/ml. 500 µl of this solution was loaded on  
69 an analytical 10.300 Superdex 200 Column (GE) and eluted at 0.25 ml/min while collecting 1 ml  
70 fractions. Concentrations were determined spectrophotometrically.

71 All hairpin RNAs were purified by 8M urea PAGE. After gel extraction, the re-annealing  
72 step was performed at low RNA concentrations by heating the RNA at 96°C for 2 mins and  
73 rapidly cooling on ice. It is notable that these hairpins are stabilized by a terminal UUCG  
74 tetraloop, which is known to promote exclusive hairpin formation by short duplexes, including  
75 those as short as four base-pairs (Cheong et al, 1990; Nozinovic et al, 2010).

#### 76 **Crystallization, Data Collection, Structure Determination, and Refinement**

77 Briefly, the RIG-I ( $\Delta$ CARDs:1-229) complex with 5'OH-GC10 duplex was preassembled  
78 by incubating at a protein:RNA molar ratio of 1:1.5 on ice for 1 hour and then purified with a  
79 HiPrep 16/60 Superdex 200 column (GE Healthcare). The crystals of the binary complex of  
80 RIG-I ( $\Delta$ CARDs:1-229):5'OH-GC10 were grown at 13 °C by mixing equal volumes of  
81 precipitating solution (0.1 M Bicine, pH 9.0, 22.5 % polyethylene glycol 6,000) and RIG-I  
82 ( $\Delta$ CARDs:1-229) : 5'OH-GC10 complex (2-3 mg ml<sup>-1</sup>) using the sitting drop method. The  
83 crystals grew into needle clusters within a week and were harvested within two weeks. The  
84 crystals were soaked in a cryoprotecting solution containing 0.1 M Bicine, pH 9.0, 30 %  
85 polyethylene glycol 6,000 for 12 hours before being flash frozen with liquid nitrogen. To grow  
86 the crystals of the ternary complex of RIG-I ( $\Delta$ CARDs:1-229):5'OH-GC10:ADP-Mg<sup>2+</sup>, the  
87 binary complex of RIG-I ( $\Delta$ CARDs:1-229):5'OH-GC10 was first incubated with 2.5 mM ADP  
88 and 2.5 mM MgCl<sub>2</sub> at 2-3 mg ml<sup>-1</sup> for half an hour to one hour on ice, mixed with equal volumes  
89 of precipitating solution (0.1 M Bicine, pH 9.0, 26-28 % polyethylene glycol 6,000) and then

90 grown at 13 °C. Crystals also grew into needle clusters within three days and were harvested  
91 within two weeks. Crystals were soaked in a cryoprotecting solution containing 0.1 M Bicine,  
92 pH 9.0, 30 % polyethylene glycol 6,000 briefly before being flash frozen with liquid nitrogen.  
93 Diffraction intensities were recorded at NE-CAT beamline ID-24 at the Advanced Photon Source  
94 (Argonne National Laboratory, Argonne, Illinois). Integration, scaling and merging of the  
95 intensities were carried out by using the programs XDS (Kabsch, 2010) and SCALA (Evans,  
96 2006).

97 Initial attempts to use the structure of RIG-I ( $\Delta$ CARDs:1-229) : 5'OH-GC10 (PDB:  
98 2ykg) as search model for molecular replacement were not successful. Rather, successful phasing  
99 was accomplished through molecular replacement by using the subgroups (HEL1: aa 236-455,  
100 HEL2-HEL2i: aa 456-793, CTD: aa 794-925, and dsRNA) of RIG-I ( $\Delta$ CARDs:1-229) : 5'OH-  
101 GC10 (PDB: 2ykg) as search models in Phaser (McCoy, 2007). Refinement cycles were carried  
102 out using Phenix Refine (Adams et al, 2010) and REFMAC5 (Murshudov et al, 1997) with four  
103 TLS (translation, liberation, screw-rotation displacement) groups (HEL1: aa 236-455, HEL2-  
104 HEL2i: aa 456-793, CTD: aa 794-925, and dsRNA). Refinement cycles were interspersed with  
105 model rebuilding using Coot (Emsley & Cowtan, 2004). The quality of the structures was  
106 analyzed with PROCHECK (Laskowski et al, 1993). A summary of the data collection and  
107 structure refinement statistics is given in **Supplementary Table 2**. During the crystallographic  
108 studies, it was noticed that crystals with RIG-I:dsRNA captured in the conformation 1, the binary  
109 complex of RIG-I and 5'OH-GC10, is always associated with the longest *c* axis (225.1 Å) of the  
110 unit cells (conformation 2, 219.8 Å and conformation 3, 207.8 Å). Figures and movies were  
111 prepared by using the program Pymol (DeLano, 2002).

## 112 **Analytical Ultracentrifugation-Sedimentation Velocity (SV) Experiments**

113 Full length RIG-I protein was mixed with 5'ppp10L, 5'ppp20L, 5'ppp30L and  
114 5'pppGC22 RNAs at a ratio of 4.5  $\mu$ M RIG-I : 1.5  $\mu$ M RNA (or RIG-I alone) in 450  $\mu$ l aliquots  
115 in buffer containing 25 mM HEPES pH 7.4, 150 mM NaCl, 2 mM MgCl<sub>2</sub>, and 5 mM BME. The  
116 SV experiments were run at 40,000 rpm in a Beckman Optima XL-I analytical ultracentrifuge.  
117 Partial specific volumes for RIG-I and RIG-I:RNA complexes and buffer density and viscosity  
118 parameters were calculated in SEDNTERP. Data analyses were performed in SEDFIT (Schuck,  
119 2000; Schuck et al, 2002).

### 120 **NADH coupled ATPase Experiments**

121 Experiments were set up in 50  $\mu$ l reaction volumes in 96 well format using Corning clear  
122 half-area flat bottom plates (#3695). Each 50  $\mu$ l reaction contained 10  $\mu$ l of 5x NADH enzyme  
123 buffer (1 mM NADH, 100 U of lactate dehydrogenase/mL, 500 U/mL of pyruvate kinase/mL,  
124 and 2.5 mM phosphoenolpyruvate), 5-10 nM of RIG-I, 5  $\mu$ l of varying amounts of either RNA or  
125 ATP, and a remaining volume of 25 mM 3-(N-morpholino)propanesulfonic acid (MOPS) pH  
126 7.4, 150 mM KCl, 2 mM DTT, and 0.1 % Triton X-100. The rate of ATP hydrolysis was  
127 indirectly determined by monitoring the loss of NADH by reading the absorbance at 340 nm  
128 using a Biotek Synergy H1 plate reader. For both the  $K_{m,ATP}$  and the  $K_{m,RNA}$  experiments, RIG-I  
129 and the RNA constructs were allowed to equilibrate for at least 2 hours before addition of ATP.  
130 Detergent was required to record reproducible ATPase rates in the 96-well Corning clear bottom  
131 plates, especially at low concentrations of RIG-I. The initial velocities ( $v_0$ ) at various RNA  
132 concentrations were plotted and fit to the following quadratic solution to the Briggs-Haldane  
133 equation:

$$134 \quad y = y_0 + (amp)^* \frac{[M_t] + [S_t] + K_M - \sqrt{([M_t] + [S_t] + K_M)^2 - 4[M_t][S_t]}}{2[M_t]} \quad (1)$$

135 [Mt] is the total protein concentration, [St] is the total [RNA],  $y_0$  is the basal activity, amp is the  
136  $k_{cat}$  (minus the basal activity), and  $K_m$  is the apparent Michaelis constant for substrate activation.  
137 The  $y_0$  was constrained to the average basal activity from the entire set of 0 nM RNA, 5 mM  
138 ATP wells. The initial velocities ( $v_0$ ) at various ATP concentrations were plotted and fit to the  
139 hyperbolic form of the above equation:

$$140 \quad y = \frac{(amp) * [ATP]}{K_M + [ATP]} \quad (2)$$

141 For the ATPase experiments in which the ATP concentration was varied, the RNA  
142 concentration were held at 500 nM for the short RNA duplexes (**Fig. 4, Supp. Fig. 2**), 500 ng/ $\mu$ L  
143 for the poly I:C experiments (**Supp. Fig. 1**), and 15 ng/ $\mu$ L for the poly I:C fractions (**Fig. 3**).  
144 Although 15 ng/ $\mu$ L was suboptimal for the longer polyIC fractions, it was the highest we could  
145 manage for all of the fractions from a single gel filtration experiment. One row from a 96 well  
146 plate constituted a single experiment with the following 12 ATP solutions in  $\mu$ M (final  
147 concentrations listed) derived from a two-thirds dilution series: 0, 30.2, 50.4, 84.0, 140.0, 233.3,  
148 388.8, 648, 1080, 1800, 3000, and 5000.

149 For the ATPase experiments in which the RNA concentration was varied, the ATP  
150 concentration was held at 5 mM, approximately 10-fold above the  $K_{m,ATP}$  measured for each  
151 RNA fraction. One row from a 96-well plate constituted a single experiment with the following  
152 12 RNA concentrations in nM (or ng/ $\mu$ L for poly I:C, final concentrations listed) from a two-fold  
153 dilution series: 0, 0.5, 1.0, 2.0, 3.9, 7.8, 15.6, 31.2, 62.5, 125, 250, and 500 (**Fig. 4, Supp. Fig. 1,**  
154 **Supp. Fig. 2**). For the gel filtered poly I:C fractions the following 12 RNA concentrations in  
155 ng/ $\mu$ L (final concentrations listed) were used from a two-fold dilution series: 0, 0.01, 0.03, 0.06,  
156 0.12, 0.23, 0.47, 0.94, 1.88, 3.75, 7.50, 15 (**Fig. 3**). In order to calculate the nM amounts of each  
157 poly I:C fraction for **Figure 3D**, the following estimates were made for the duplex lengths of

158 fractions A1-A7 respectively based on the semi-denaturing polyacrylamide gel and molecular  
159 weight standards shown in Figure 6C: 500, 360, 180, 90, 60, 40, and 25. The nM concentration  
160 ranges used for the analysis of the gel filtered poly I:C fractions is shown in the **Supplementary**  
161 **Table 3.**

### 162 **Cell Culture Interferon- $\beta$ Response**

163 Batches of 293T cells were grown to 70-80% confluency in 10 cm dishes in Dulbecco's  
164 Modified Eagle Medium (DMEM; Invitrogen) containing 10% heat-inactivated fetal calf serum  
165 (Hyclone) and non-essential amino acids (Invitrogen). For RIG-I transfections of 10 cm dishes  
166 of 293T cells, one 800  $\mu$ l aliquot of Opti-MEM containing 4  $\mu$ g of pUNO-RIG-I, 1  $\mu$ g of pRL-  
167 TK, and 5  $\mu$ g of an IFN- $\beta$ /Firefly luciferase reporter plasmid was mixed with a second 800  $\mu$ l  
168 aliquot of Opti-MEM containing 50  $\mu$ l of lipofectamine. After 45 minutes, the 1.6 mL aliquot  
169 was diluted four-fold with Opti-MEM and then added to a 10 cm dish of 293T cells. The  
170 transfection was allowed to proceed for 6-8 hours, and then 10 mL of fresh DMEM was added to  
171 the plate. The cells were split twice into 15 cm dishes over the course of three days in 3  $\mu$ g/ $\mu$ L  
172 blasticidin, and then used for transfections in 96 well plates containing RNA hairpins or poly I:C  
173 fractions.

174 The 293T cells, in DMEM without blasticidin, and transfected with pUNO-RIG-I, pRL-  
175 TK, and IFN- $\beta$ /Firefly luciferase reporter, were seeded at 15,000 cells per well, with each well  
176 containing 5  $\mu$ l of Lyovec (Invivogen), and the following final concentrations of 5'ppp RNA  
177 hairpin in nM: 39.1, 78.1, 156.3, 312.5, 625 or the following final concentrations of poly I:C in  
178 total ng per well: 15.6, 31.3, 62.5, 125, 250, 500. In each experiment, the RNA hairpin or poly  
179 I:C was tested three times at each concentration (or total RNA amount). Luminescence  
180 measurements were assayed between 16-24 hours after stimulation by the RNA.



181 For luciferase measurements, the Promega Dual Luciferase Reporter assay system was  
182 used to quantitate the cellular levels of firefly and Renilla luciferase. Briefly, media was  
183 aspirated from each 96 well plate and replaced with 60  $\mu$ L of passive lysis buffer. After 15  
184 minutes at room temperature, lysates were collected, clarified by centrifugation, and then 20  $\mu$ l  
185 of lysate was assayed for firefly and Renilla luciferase using the luminometer from a Biotek  
186 Synergy H1 plate reader with a dual injector. The Renilla luciferase is an internal control for  
187 each experiment and set of transfections, and the ratio of firefly luciferase over Renilla luciferase  
188 is reported in this paper.

#### 189 **Accession code**

190 The atomic coordinates and structure factors of the binary complex of RIG-I  
191 ( $\Delta$ CARDs:1-229) : 5'OH-GC10 and the ternary complex of RIG-I ( $\Delta$ CARDs:1-229) : 5'OH-  
192 GC10 : ADP-Mg<sup>2+</sup> have been deposited with the RCSB Protein Data Bank under the accession  
193 codes 3zd6 and 3zd7. The ternary complex of RIG-I ( $\Delta$ CARDs:1-229) : 5'OH-GC10 : SO<sub>4</sub><sup>2+</sup> is  
194 already available under the accession code 2ykg and was published in **Luo et al., 2011**.

195

196

197

198

199

200

201

202

203

204

205 **Supplementary Tables**206 **Supplementary Table 1. Crystallographic and structure refinement statistics.**

207

| <b>Data collection</b>       |                                                            |                                                                                         |                                                                    |
|------------------------------|------------------------------------------------------------|-----------------------------------------------------------------------------------------|--------------------------------------------------------------------|
| Structure                    | RIG-I ( $\Delta$ CARDs 1-229):<br>GC10<br>(Conformation 1) | RIG-I ( $\Delta$ CARDs 1-229):<br>GC10:SO <sub>4</sub><br>(Conformation 2) <sup>b</sup> | RIG-I ( $\Delta$ CARDs 1-229):<br>GC10: ADP-Mg<br>(Conformation 3) |
| Space group                  | <i>P</i> 2 <sub>1</sub> 2 <sub>1</sub> 2 <sub>1</sub>      | <i>P</i> 2 <sub>1</sub> 2 <sub>1</sub> 2 <sub>1</sub>                                   | <i>P</i> 2 <sub>1</sub> 2 <sub>1</sub> 2 <sub>1</sub>              |
| Cell dimensions (Å)          | 48.5, 78.0, 225.1                                          | 47.6, 76.2, 219.8                                                                       | 48.3, 76.1, 207.8                                                  |
| Resolution (Å)               | 48.5 - 2.8 (2.9 - 2.8) <sup>a</sup>                        | 47.6 - 2.5 (2.6 - 2.5)                                                                  | 48.3 - 2.5 (2.6 - 2.5)                                             |
| R merge (%)                  | 6.4 (70.6)                                                 | 7.5 (62.3)                                                                              | 6.4 (57.3)                                                         |
| I / $\sigma$                 | 16.2 (1.8)                                                 | 14.5 (1.5)                                                                              | 11.4 (1.9)                                                         |
| Completeness (%)             | 99.3 (98.6)                                                | 93.8 (58.8)                                                                             | 98.1 (98.9)                                                        |
| Redundancy                   | 5.0 (4.8)                                                  | 5.0 (2.2)                                                                               | 3.4 (3.1)                                                          |
| <b>Refinement</b>            |                                                            |                                                                                         |                                                                    |
| Resolution (Å)               | 25.0 - 2.8                                                 | 45.0 - 2.5                                                                              | 25.0 - 2.5                                                         |
| R work / R free (%)          | 22.2 / 27.9                                                | 22.4 / 27.5                                                                             | 22.9 / 28.8                                                        |
| No. atoms                    | 5,380                                                      | 5,517                                                                                   | 5,369                                                              |
| Protein                      | 4,947                                                      | 4,985                                                                                   | 4,857                                                              |
| RNA/ADP-Mg <sup>2+</sup>     | 424                                                        | 424                                                                                     | 424 / 28                                                           |
| Water                        | 9                                                          | 99                                                                                      | 60                                                                 |
| B-factors (Å <sup>2</sup> )  | 74.7                                                       | 57.9                                                                                    | 66.2                                                               |
| Protein                      | 75.1                                                       | 58.1                                                                                    | 66.4                                                               |
| Ligand                       | 71.7                                                       | 65.7                                                                                    | 70.2                                                               |
| Solvent                      | 74.6                                                       | 48.2                                                                                    | 51.9                                                               |
| <b>Ramachandran analysis</b> |                                                            |                                                                                         |                                                                    |
| Favored                      | 86.3                                                       | 94.2                                                                                    | 89.1                                                               |
| Additionally allowed         | 12.8                                                       | 4.8                                                                                     | 10.4                                                               |
| Outliers                     | 0.9                                                        | 1.0                                                                                     | 0.5                                                                |
| <b>R.m.s. deviations</b>     |                                                            |                                                                                         |                                                                    |
| Bond lengths (Å)             | 0.099                                                      | 0.086                                                                                   | 0.097                                                              |
| Bond angles (°)              | 1.6                                                        | 1.3                                                                                     | 1.5                                                                |
| <b>PDB ID</b>                | 3zd6                                                       | 2ykg                                                                                    | 3zd7                                                               |

208

209 <sup>a</sup> Statistics for the highest resolution shell is shown in parenthesis.210 <sup>b</sup> Reference data taken from <http://www.rcsb.org/pdb/explore/explore.do?structureId=2ykg>. (Luo et al., 2011.)

211

212

213 **Supplementary Table 2. Nucleic acids used in this study.**  
 214

| <b>Name</b>      | <b>Sequence and Chemical Composition</b>                                     |
|------------------|------------------------------------------------------------------------------|
| <b>GC8</b>       | 5'OH-GCGCGCGC-3'                                                             |
| <b>GC10</b>      | 5'OH-GCGCGCGCGC-3'                                                           |
| <b>GC12</b>      | 5'OH-GCGCGCGCGCGC-3'                                                         |
| <b>GC14</b>      | 5'OH-GCGCGCGCGCGCGC-3'                                                       |
| <b>GC18</b>      | 5'OH-GCGCGCGCGCGCGCGC-3'                                                     |
| <b>GC22</b>      | 5'OH-GCGCGCGCGCGCGCGCGC-3'                                                   |
| <b>5'pppGC10</b> | 5'ppp-GGCGCGCGCC-3'                                                          |
| <b>5'pppGC12</b> | 5'ppp-GGCGCGCGCGCC-3'                                                        |
| <b>5'pppCM12</b> | 5'ppp-GGACGUACGUCC-3'                                                        |
| <b>5'pppGC22</b> | 5'ppp-GGCGCGCGCGCGCGCGCGCC-3'                                                |
| <b>5'ppp8L</b>   | 5'ppp-GGCGCGGC UUCG GCCGCG CC-3'                                             |
| <b>5'ppp10L</b>  | 5'ppp-GGACGUACGU UUCG ACGUACGUCC-3'                                          |
| <b>5'ppp20L</b>  | 5'pppGGAUCGAUCGAUCGAUCGGCUUCGGCCGAUCGAUCG<br>AUCGAUCC-3'                     |
| <b>5'ppp30L</b>  | 5'pppGGAUCGAUCGAUCGAUCGGCAUCGAUCGGCUUCGGC<br>CGAUCGAUGCCGAUCGAUCGAUCGAUCC-3' |
| <b>polyIC</b>    | 5'OH-I <sup>n</sup> :C <sup>n</sup> -3' (0.02-1 kilo base pairs)             |

215  
 216

217 **Supplementary Table 3. Poly I:C ng/ $\mu$ l to nanomolar calculations.** The estimates for the  
 218 length of each fraction of poly I:C as well as the approximate molecular weights (**Fig. 3A**). The  
 219 ng/ $\mu$ l concentrations used in the poly I:C  $K_{m,RNA}$  experiment were converted to nanomolar of  
 220 poly I:C strands based on the estimated length and molecular weights of each poly I:C strand.  
 221

| <b>Poly I:C<br/>(ng/<math>\mu</math>L)</b> | <b>A1 (nM)</b> | <b>A2 (nM)</b> | <b>A3 (nM)</b> | <b>A4 (nM)</b> | <b>A5 (nM)</b> | <b>A6 (nM)</b> | <b>A7 (nM)</b> |
|--------------------------------------------|----------------|----------------|----------------|----------------|----------------|----------------|----------------|
| 0.00                                       | 0.00           | 0.00           | 0.00           | 0.00           | 0.00           | 0.00           | 0.00           |
| 0.01                                       | 0.04           | 0.06           | 0.12           | 0.24           | 0.36           | 0.55           | 0.87           |
| 0.03                                       | 0.09           | 0.12           | 0.24           | 0.48           | 0.73           | 1.09           | 1.75           |
| 0.06                                       | 0.17           | 0.24           | 0.48           | 0.97           | 1.45           | 2.18           | 3.49           |
| 0.12                                       | 0.35           | 0.48           | 0.97           | 1.94           | 2.91           | 4.36           | 6.98           |
| 0.23                                       | 0.70           | 0.97           | 1.94           | 3.88           | 5.82           | 8.73           | 13.96          |
| 0.47                                       | 1.40           | 1.94           | 3.88           | 7.76           | 11.64          | 17.45          | 27.93          |
| 0.94                                       | 2.79           | 3.88           | 7.76           | 15.51          | 23.27          | 34.91          | 55.85          |
| 1.88                                       | 5.59           | 7.76           | 15.51          | 31.03          | 46.54          | 69.82          | 111.71         |
| 3.75                                       | 11.17          | 15.51          | 31.03          | 62.06          | 93.09          | 139.63         | 223.41         |
| 7.50                                       | 22.34          | 31.03          | 62.06          | 124.12         | 186.18         | 279.26         | 446.82         |
| 15.00                                      | 44.68          | 62.06          | 124.12         | 248.24         | 372.35         | 558.53         | 893.65         |
| <b>Length</b>                              | 500            | 360            | 180            | 90             | 60             | 40             | 25             |
| <b>MW</b>                                  | 335703         | 241706.16      | 120853.08      | 60426.54       | 40284.36       | 26856.24       | 16785.15       |

222  
 223  
 224  
 225  
 226  
 227  
 228  
 229  
 230  
 231  
 232  
 233  
 234  
 235

236 **Supplementary Table 4. RNA stimulated ATP hydrolysis by RIG-I.**

237

| <b>RNA construct</b> | $k_{\text{cat}} \pm \text{SD}(\text{s}^{-1}\text{RIG-I}^{-1})$ | $K_{\text{m,ATP}} \pm \text{SD}(\mu\text{M})$ | $K_{\text{m,RNA}} \pm \text{SD}(\text{nM})$ |
|----------------------|----------------------------------------------------------------|-----------------------------------------------|---------------------------------------------|
| <b>5'ppp8L</b>       | 7.45 ± 0.90                                                    | 454 ± 18                                      | 5.16 ± 0.40                                 |
| <b>5'ppp10L</b>      | 14.3 ± 2.5                                                     | 556 ± 65                                      | 4.46 ± 0.50                                 |
| <b>5'ppp20L</b>      | 12.6 ± 1.6                                                     | 604 ± 40                                      | 10.1 ± 0.50                                 |
| <b>5'ppp30L</b>      | 9.98 ± 1.3                                                     | 622 ± 100                                     | 10.8 ± 1.0                                  |
| <b>GC8</b>           | 7.34 ± 2.6                                                     | 425 ± 66                                      | 91.4 ± 15                                   |
| <b>GC10</b>          | 14.4 ± 3.0                                                     | 511 ± 55                                      | 24.4 ± 1.5                                  |
| <b>GC12</b>          | 15.9 ± 3.1                                                     | 528 ± 38                                      | 13.1 ± 1.0                                  |
| <b>GC14</b>          | 15.1 ± 1.9                                                     | 537 ± 31                                      | 23.2 ± 1.3                                  |
| <b>GC18</b>          | 12.5 ± 1.3                                                     | 600 ± 37                                      | 26.7 ± 3.4                                  |
| <b>GC22</b>          | 11.3 ± 1.1                                                     | 570 ± 75                                      | 27.3 ± 1.1                                  |
| <b>5'pppGC10</b>     | 18.8 ± 2.8                                                     | 498 ± 35                                      | 1.16 ± 0.20                                 |
| <b>5'pppGC12</b>     | 20.5 ± 3.3                                                     | 535 ± 55                                      | 2.33 ± 0.20                                 |
| <b>5'pppCM12</b>     | 15.9 ± 1.8                                                     | 591 ± 57                                      | 2.62 ± 0.10                                 |
| <b>5'pppGC22</b>     | 12.3 ± 1.9                                                     | 536 ± 39                                      | 3.58 ± 1.0                                  |
| <b>LMW poly I:C</b>  | 4.90 ± 0.50                                                    | 690 ± 130                                     | 2.40 ± 1.1 (ng/μl)                          |

238

239 \*\*\*Note that for the poly I:C  $K_{\text{m,ATP}}$ , the poly I:C concentration was kept at 500 ng/μl. And for  
 240 the poly I:C  $K_{\text{m,RNA}}$ , the poly I:C concentration was varied up to 500 ng/μl.

241

242

243

244

245

246

247

248

249

250

251

252 **Supplementary Figure 1.  $K_{m,ATP}$  and  $K_{m,RNA}$  ATPase experiments on LMW poly I:C.**

253 **(A)** ATPase activity of RIG-I stimulated by 500 ng/ $\mu$ L LMW poly I:C while varying the ATP  
254 concentration from 0 to 5 mM ATP. Error bars report the standard deviation from 4  
255 experiments. **(B)** ATPase activity of RIG-I at 5 mM ATP while varying LMW poly I:C from 0  
256 to 500 ng/ $\mu$ L. Error bars report the standard deviation from 4 experiments. The average  $k_{cat}$   
257 from both experiments was 4.9  $s^{-1}$ , and the  $K_{m,ATP}$  was approximately 700  $\mu$ M. The  $K_{m,RNA}$  was  
258 2.4 ng/ $\mu$ L, which is difficult to interpret because it cannot be expressed as a nanomolar value due  
259 to the heterogeneity of poly I:C samples

260

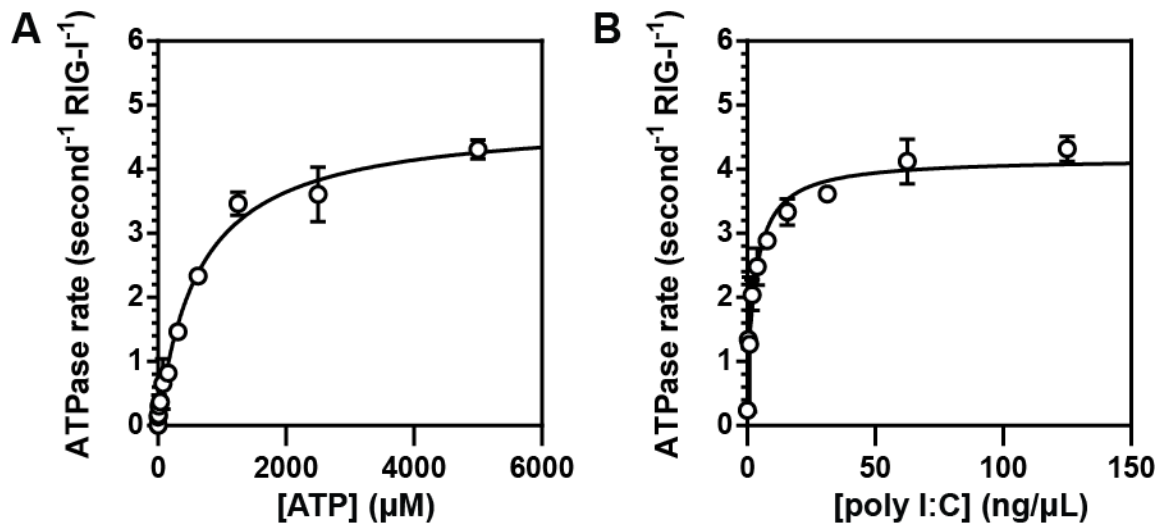

261

262

263

264

265

266

267

268

269 **Supplementary Figure 2.  $K_{m,ATP}$  and  $K_{m,RNA}$  ATPase experiments on short duplex RNA.**

270 ATPase activity of RIG-I stimulated by various length RNAs including 5'triphosphorylated

271 hairpins, 5'hydroxyl duplexes, and 5'triphosphorylated duplexes. The  $K_{m,ATP}$  of RIG-I (10 nM

272 enzyme) stimulated by each RNA was measured by varying the ATP concentrations ranging

273 from 0 to 5 mM at 500 nM RNA. The  $K_{m,RNA}$  of RIG-I (5 nM enzyme) stimulated by each RNA

274 was measured by varying the RNA concentrations ranging from 0 to 500 nM at 5 mM ATP. A

275 small basal activity (0 nM RNA) is measured for RIG-I of less than 1 per second. Error bars for

276 the  $K_{m,ATP}$  and  $K_{m,RNA}$  experiments report the standard error of the mean from 4 experiments.

277 The last column of graphs plots the average  $k_{cat}$  values calculated from Briggs-Haldane fits from

278 both the  $K_{m,ATP}$  and  $K_{m,RNA}$  experiments. Error bars for the  $k_{cat}$  summary report the standard

279 deviation measured across 6 experiments, in which each experiment was comprised of an

280 averaged duplicate dataset for each RNA or ATP concentration. **(A)** ATPase measurements on 4

281 triphosphorylated hairpins with a duplex region of 8, 10, 20, and 30 nucleotides with a UUCG

282 hairpin. **(B)** ATPase measurements on 6 double stranded RNA duplexes with 5'hydroxyl of

283 length 8, 10, 12, 14, 18, and 22. **(C)** ATPase measurements on 4 double stranded RNA duplexes

284 with a 5'triphosphate of length 10, 12, and 22. **Supplementary Table 2** lists the RNA

285 sequences used in this study. We observed similar  $k_{cat}$  values for RIG-I stimulated by the

286 5'ppp8L hairpin and GC8. However, in the case of the hairpin, we observed a 5.2 nM  $K_{m,RNA}$ ,

287 approximately 20-fold smaller than GC8, perhaps because 5'ppp8L contains a 'UUCG'

288 tetraloop, which may accommodate the HEL2i flexibility seen in the crystal structures.

289

290

291

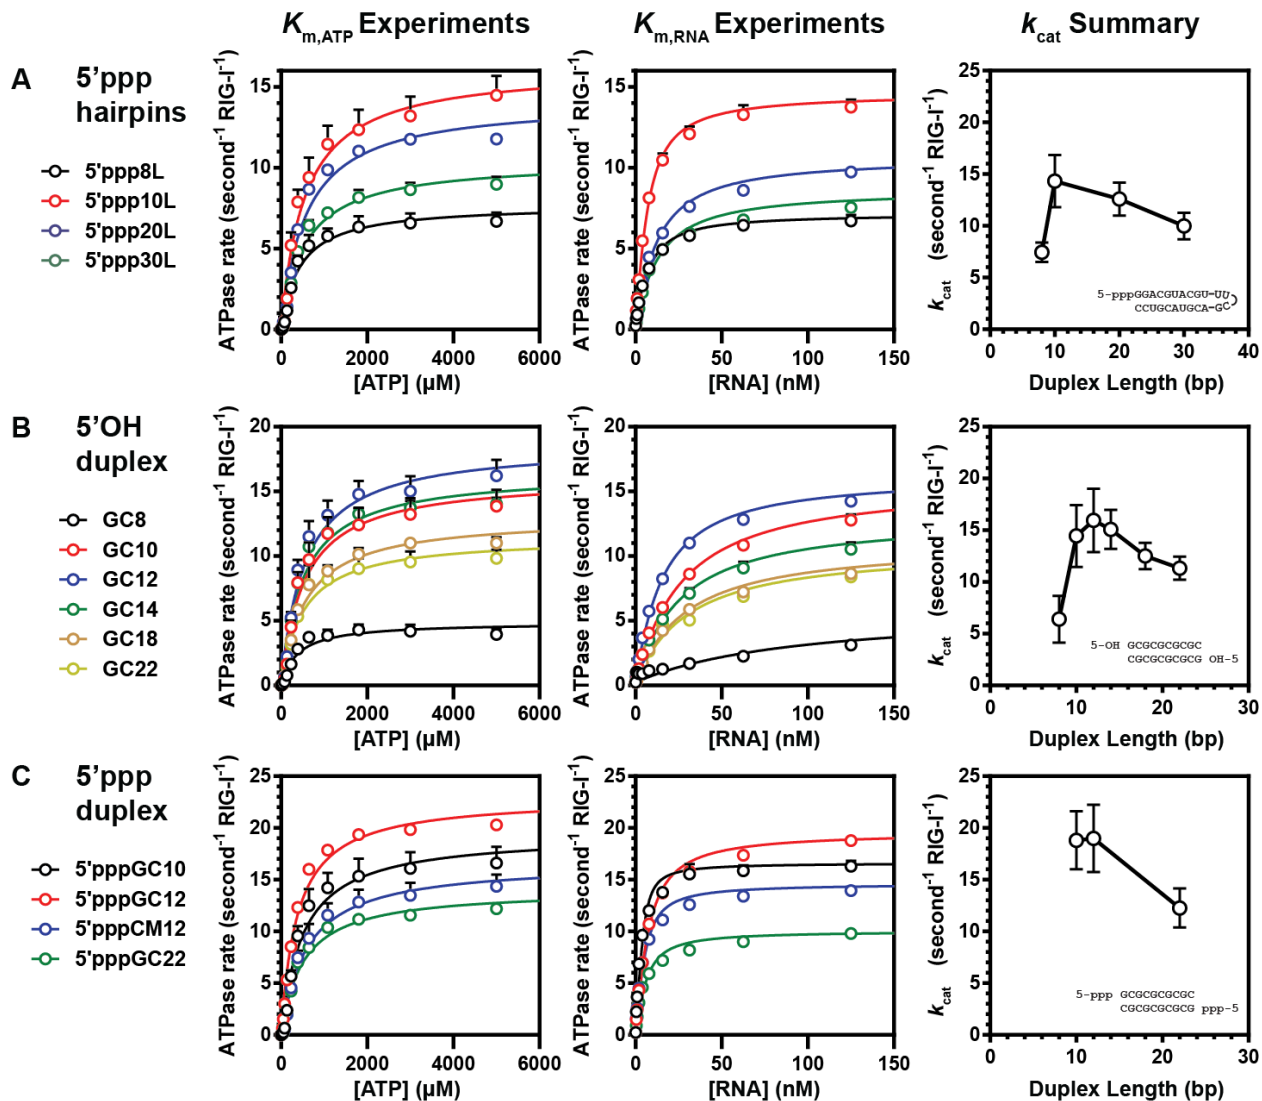

292

293

294

295

296

297

298

299

300



301 **Supplementary Figure 3. Mock control for HEK293T cell culture IFN production.**

302 The IFN- $\beta$  production in 293T cells overexpressing RIG-I (and a mock control not  
303 overexpressing RIG-I) was measured in the absence (left) and presence (right) of poly I:C  
304 stimulation. The relative luciferase is the firefly luciferase (IFN- $\beta$  reporter) divided by the  
305 Renilla luciferase. The following protocol was adapted from Luo et. al. (Luo et al, 2011). 293T  
306 cells were seeded at ~ 50,000 cells per well in 24 well plates. The next day, 293T cells were  
307 transfected with 30 ng of pRLTK, 178 ng of a firefly IFN- $\beta$  reporter, and 3 ng (or none for  
308 mock) of pUNO-RIG-I per well using lipofectin (Invitrogen). After 24 hours, 293T cells were  
309 transfected with 1  $\mu$ g of poly I:C (or none for negative control) using mRNA transfection reagent  
310 (MIRUS). After 16 hours, cells were harvested and assayed for firefly and *Renilla* luciferase  
311 using the Promega Dual Luciferase Reporter assay system. Error bars report the standard  
312 deviation from 6 experiments for unstimulated and 12 experiments for stimulated.

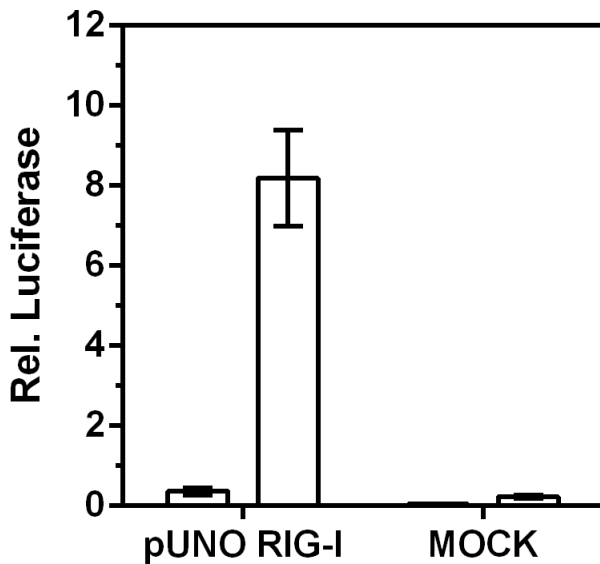

313

314

315

316 **Supplementary Figure 4. Cell culture IFN production on different lengths of poly I:C.**

317 The IFN- $\beta$  responses to the fractions of poly I:C was measured in HEK 293T cells transfected  
318 with pUNO-RIG-I, an IFN- $\beta$ /Firefly luciferase reporter, and a pRL-TK reporter (note that the  
319 poly I:C data is the same as in Figure 4D and was done side by side with Fraction A1-A7 shown  
320 here). The charts display the measured relative luciferase ratio of Firefly luminescence over  
321 Renilla luminescence from 293T cells in which RIG-I was stimulated by the fractions of poly  
322 I:C, and also a single stranded poly U and no RNA (serum free media) control. The range of  
323 RNA concentrations spans between 31 to 250 ng per well displayed in the figure by a darkening  
324 color gradient from low to high RNA concentration. Error bars report the standard error of the  
325 mean from 3 measurements.

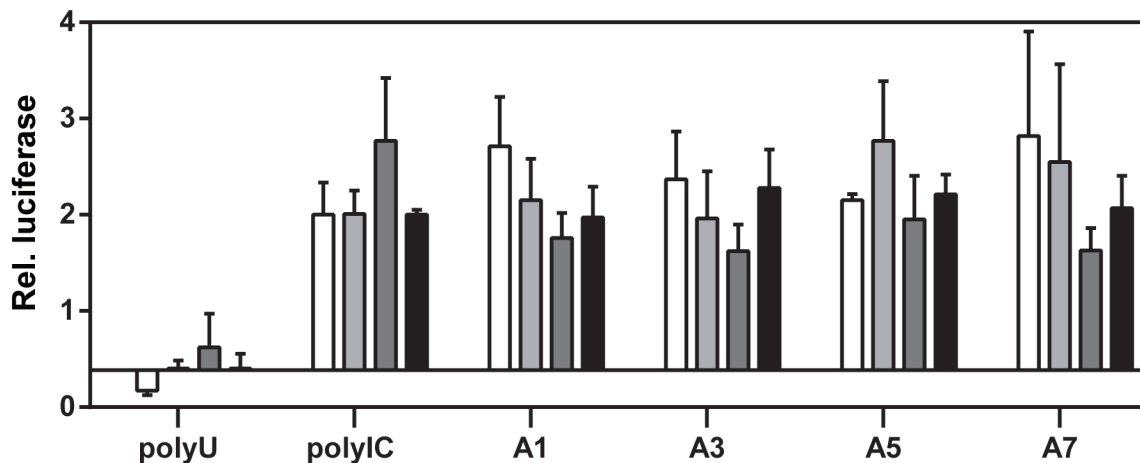

326

327

328

329

330

331

332

333 **Supplementary References**

- 334 **Adams PD, Afonine PV, Bunkoczi G, Chen VB, Davis IW, Echols N, Headd JJ, Hung LW,**  
335 **Kapral GJ, Grosse-Kunstleve RW, McCoy AJ, Moriarty NW, Oeffner R, Read RJ,**  
336 **Richardson DC, Richardson JS, Terwilliger TC, Zwart PH (2010) PHENIX: a**  
337 **comprehensive Python-based system for macromolecular structure solution. *Acta***  
338 ***Crystallogr D Biol Crystallogr* 66: 213-221**  
339
- 340 **Cheong C, Varani G, Tinoco I, Jr. (1990) Solution structure of an unusually stable RNA**  
341 **hairpin, 5'GGAC(UUCG)GUCC. *Nature* 346: 680-682**  
342
- 343 **DeLano WL (2002) *The PyMOL User's Manual*: DeLano Scientific, Palo Alto, CA, USA.**  
344
- 345 **Emsley P, Cowtan K (2004) Coot: model-building tools for molecular graphics. *Acta***  
346 ***Crystallogr D Biol Crystallogr* 60: 2126-2132**  
347
- 348 **Evans P (2006) Scaling and assessment of data quality. *Acta Crystallogr D Biol Crystallogr***  
349 **62: 72-82**  
350
- 351 **Kabsch W (2010) Xds. *Acta Crystallogr D Biol Crystallogr* 66: 125-132**  
352
- 353 **Kao C, Zheng M, Rudisser S (1999) A simple and efficient method to reduce nontemplated**  
354 **nucleotide addition at the 3 terminus of RNAs transcribed by T7 RNA polymerase. *Rna* 5:**  
355 **1268-1272**  
356
- 357 **Laskowski RA, Macarthur M. W., Moss D. S., Thornton JM (1993) PROCHECK: a**  
358 **program to check the stereochemical quality of protein structures. *J Appl Cryst* 26: 283-291**  
359
- 360 **Luo D, Ding SC, Vela A, Kohlway A, Lindenbach BD, Pyle AM (2011) Structural insights**  
361 **into RNA recognition by RIG-I. *Cell* 147: 409-422**  
362
- 363 **McCoy AJ (2007) Solving structures of protein complexes by molecular replacement with**  
364 **Phaser. *Acta Crystallogr D Biol Crystallogr* 63: 32-41**  
365
- 366 **Murshudov GN, Vagin AA, Dodson EJ (1997) Refinement of macromolecular structures by**  
367 **the maximum-likelihood method. *Acta Crystallogr D Biol Crystallogr* 53: 240-255**  
368
- 369 **Nozinovic S, Furtig B, Jonker HR, Richter C, Schwalbe H (2010) High-resolution NMR**  
370 **structure of an RNA model system: the 14-mer cUUCGg tetraloop hairpin RNA. *Nucleic***  
371 ***Acids Res* 38: 683-694**  
372
- 373 **Schuck P (2000) Size-distribution analysis of macromolecules by sedimentation velocity**  
374 **ultracentrifugation and lamm equation modeling. *Biophysical journal* 78: 1606-1619**  
375
- 376 **Schuck P, Perugini MA, Gonzales NR, Howlett GJ, Schubert D (2002) Size-distribution**  
377 **analysis of proteins by analytical ultracentrifugation: strategies and application to model**  
378 **systems. *Biophysical journal* 82: 1096-1111**
